# Supplementary material for: Daily electrical activity in the master circadian clock of a diurnal mammal
Source: eLife. 2021 Nov 30;10:e68179. doi: 10.7554/eLife.68179 (PMC8631794; doi:10.7554/eLife.68179)
Supplement: Figure 2—source data 1. [file elife-68179-fig2-data1.xlsx]

## Sheet: Fig2_SourceData1
	Figure 2. Diurnal changes in the spontaneous electrical activity of Rhabdomys pumilio SCN neurons
	Figure 2C-Percentages of SCN neurons in the different electrical states during the day and at night							Figure 2D-Resting Membrane Potential (RMP(mV)) in R.pumilio SCN neurons during the day and at night					Figure 2E-Spontaneuous Firing Rate (SFR (Hz)) in R.pumilio SCN neurons during the day and at night					Figure 2F-Input Resistance (Rinp (GΩ)) in R.pumilio SCN neurons during the day and at night
								Day		Night			Day		Night			Day		Night
	N	Firing	Depolarized Silent/ DLAMOs	Hyperpolarized Silent	Total			Slice	RMP	Slice	RMP		Slice	SFR	Slice	SFR		Slice	Rinp	Slice	Rinp
	Day	61	6	0	67			1	-40.5091	5	-45.1087		1	2.81425	5	2.92565		1	2.26525	5	1.45864
	Night	33	0	11	44			1	-53.2916	5	-42.7174		1	1.55447	5	4.38669		1	3.5143	5	3.69318
								1	-45.4024	5	-38.2609		1	1.73696	5	0		1	2.11705	5	2.22357
	%	Firing	Depolarized Silent/ DLAMOs	Hyperpolarized Silent	Total			1	-42.3776	5	-45.9783		1	3.05049	5	4.02985		1	1.1415	5	3.83987
	Day	91.0448	8.95522	0	100			1	-48.986	5	-41.413		1	1.38585	5	1.61128		1	1.88129	5	1.77014
	Night	75	0	25	100			1	-47.6336	5	-46.5217		1	4.18057	5	3.92468		1	1.75117	5	2.59342
								1	-32.72	5	-44.1304		1	0	5	1.51086		1	2.35681	5	2.20634
	Chi-Square Test	χ2=21.498	p<0.001					1	-47.2028	5	-48.1522		1	4.09456	5	3.06558		1	2.13438	5	1.22212
	Day vs. Night							1	-39.4406	6	-45.4348		1	3.85581	6	1.50334		1	3.74591	6	2.00054
								1	-36.9703	6	-47.0652		1	2.99552	6	1.59019		1	1.40917	6	1.89643
								2	-39.4271	6	-60.4699		2	3.35338	6	0		2	1.25359	6	3.11737
								2	-33.1698	6	-45.6522		2	0	6	1.34237		2	1.16243	6	1.57294
								2	-44.5726	6	-47.0652		2	3.25837	6	2.38946		2	1.4436	6	3.24758
								2	-35.5028	6	-47.8261		2	0	6	3.34165		2	1.14288	6	2.07246
								2	-43.3899	6	-48.3333		2	3.17472	6	4.85815		2	1.74437	6	1.84866
								2	-41.9258	6	-50.1747		2	1.77647	6	0		2	1.93659	6	3.14362
								2	-44.3706	6	-61.0278		2	1.54138	6	0		2	2.4767	6	1.3562
								2	-37.9476	6	-45.6522		2	0	6	0.06667		2	2.58863	6	1.4899
								2	-41.1996	7	-57.3768		2	4.53927	7	0		2	0.84345	7	2.6749
								2	-41.0974	7	-44.2173		2	4.72689	7	0		2	1.86244	7	4.47216
								2	-39.2651	7	-42.2826		2	4.01396	7	1.71199		2	1.01802	7	2.82353
								2	-46.9802	7	-47.6471		2	1.87888	7	0		2	2.31991	7	2.81168
								2	-48.3258	7	-44.7826		2	1.77731	7	1.35185		2	1.3013
								2	-42.5464	7	-42.0652		2	3.87705	7	4.95312		2	1.37642	7	2.47626
								2	-40.4585	7	-44.4565		2	4.53943	7	5.3369		2	1.62492	7	1.97131
								3	-43.6253	7	-44.3478		3	2.04377	7	2.28137		3	2.42099	7	2.3991
								3	-38.1818	7	-50		3	2.59668	7	0		3	2.89943	7	2.05111
								3	-46.4685	8	-50.9783		3	1.47885	8	1.32374		3	1.51956	8	3.66315
								3	-21.5555	8	-54.9262		3	0	8	0		3	2.20609	8	1.91016
								3	-44.2865	8	-42.5		3	2.64341	8	0.35986		3	1.31118	8	1.68207
								3	-45.6294	8	-39.7826		3	2.33413	8	1.55288		3	1.90221	8	1.41857
								3	-47.3595	8	-40.3261		3	1.822	8	0		3	2.40531	8	1.14405
								3	-46.5734	8	-44.8913		3	2.60233	8	1.75105		3	1.626	8	1.6117
								3	-33.8453	8	-44.5652		3	3.56468	8	2.7921		3	1.56519	8	1.52701
								3	-45	8	-38.8895		3	3.13344	8	0.58546		3	1.62969	8	1.05514
								3	-43.0774	8	-50.9975		3	2.15459	8	0		3	2.86977	8	1.77907
								3	-44.9158	8	-45.5435		3	1.45459	8	1.99775		3	1.39342	8	2.42379
								3	-53.0769	8	-47.2826		3	0.23182	8	1.79958		3	2.37595	8	1.74206
								3	-42.3755	8	-46.527		3	1.5794	8	0.48738		3	1.70516	8	1.70717
								3	-45.5376	8	-42.1292		3	2.25464	8	2.04773		3	2.01283	8	1.22113
								3	-43.684	8	-35.3362		3	3.02823	8	1.01449		3	2.33606	8	1.18329
								3	-46.8569	8	-53.8043		3	2.36549	8	0.08758		3	1.65692	8	2.08111
								3	-45.4196	8	-46.9565		3	1.67927	8	4.33642		3	2.67642	8	1.7468
								3	-44.1608	8	-46.8767		3	2.3605	8	0.65562		3	2.09353	8	3.69937
								3	-43.7152				3	2.99239				3	1.53532
								3	-49.8252				3	1.47712				3	2.68581
								3	-42.8284				3	8.19904
								4	-43.007				4	2.91005				4	2.26463
								4	-35.3264				4	0				4	2.75482
								4	-39.6156				4	0.26401				4	2.22452
								4	-44.3135				4	5.01063				4	1.83521
								4	-42.0857				4	2.01556				4	2.13305
								4	-41.8019				4	4.81998				4	2.16481
								4	-42.4436				4	5.91024				4	1.74809
								4	-44.2547				4	3.85414				4	2.51254
								4	-42.3047				4	5.16225				4	4.04806
								4	-40.1825				4	0.33261				4	1.88824
								4	-40.2285				4	4.16509				4	1.25178
								4	-47.6238				4	7.6525				4	4.23009
								4	-45.6294				4	6.27402				4	1.7244
								4	-35.0589				4	11.2067				4	2.79694
								4	-32.3277				4	0.22634				4	1.41955
								4	-49.0909				4	1.96593				4	1.76136
								4	-39.0635				4	2.35487				4	2.06878
								4	-44.6853				4	2.50172				4	1.73725
								4	-44.9983				4	2.94216				4	1.67565
								4	-34.3007				4	2.74182				4	2.48141
								MEAN	-42.4038		-46.3744		MEAN	2.81243		1.65848		MEAN	2.0297		2.18671
								SEM	0.643421		0.79839		SEM	0.249775		0.241317		SEM	0.0843398		0.127323
								N	67		44		N	67		44		N	66		43
								mixed-effects linear model	F(1, 5.036)=10.249		p=0.024	mixed-effects linear model		F(1, 7.027)=5.998		p=0.044	mixed-effects linear model		F(1, 5.984)=0.878		p=0.385
