# Supplementary material for: Daily electrical activity in the master circadian clock of a diurnal mammal
Source: eLife. 2021 Nov 30;10:e68179. doi: 10.7554/eLife.68179 (PMC8631794; doi:10.7554/eLife.68179)
Supplement: Figure 3—source data 1. [file elife-68179-fig3-data1.xlsx]

## Sheet: Fig3_SourceData1
	Figure 3. Diverse responses to depolarizing and hyperpolarizing current pulses in Rhabdomys pumilio SCN neurons
	Figure 3D-Responses to depolarizing current pulses						Figure 3G-Responses to hyperpolarizing current pulses
	N	Non-Adapting	Adapting-Firing	Adapting-to-Silent	Total		N	Delay-to-fire	Rebound	Total
	Day	11	19	29	59		Day	23	41	64
	Night	10	9	24	43		Night	11	28	39
	Total	21	28	53	102		Total	34	69	103
	%	Non-Adapting	Adapting-Firing	Adapting-to-Silent	Total		%	Delay-to-fire	Rebound	Total
	Day	18.6441	32.2034	49.1525	100		Day	35.9375	64.0625	100
	Night	23.2558	20.9302	55.814	100		Night	28.2051	71.7949	100
	Chi-Square Test	χ2=1.621	p=0.4447				Chi-Square Test	χ2=0.6552	p=0.4183
	Day vs. Night						Day vs. Night
