# Supplementary material for: Daily electrical activity in the master circadian clock of a diurnal mammal
Source: eLife. 2021 Nov 30;10:e68179. doi: 10.7554/eLife.68179 (PMC8631794; doi:10.7554/eLife.68179)
Supplement: Figure 6—source data 1. [file elife-68179-fig6-data1.xlsx]

## Sheet: Fig6_SourceData1
	Figure 6. Responses to hyperpolarizing pulses in Rhabdomys pumilio SCN neurons and the underlying ionic mechanisms
	Figure 6I-Latencies (s) to fire upon termination of the hyperpolarizing pulses (1s, -30 pA) in Type-B cells under baseline conditions, in the presence of 4-AP, and during washout.
			Cell ID	Baseline	4-AP	Wash Out
			Cell1	1.04192	0.07788	0.9088
			Cell2	0.38827	0.07412	0.31808
			Cell3	0.29072	0.06344	0.26776
			Cell4	0.2756	0.05976	0.29208
			Cell5	0.89688	0.14565	1.09952
			Cell6	0.68216	0.0958	0.62234
			MEAN	0.595925	0.0861083	0.584763
			SEM	0.133641	0.0129854	0.14476
			N	6	6	6
		One-way repeated measures ANOVA	F(2,10)=14.09	p=0.0012
		Sphericity Assumed
		Tukey's multiple comparisons test	Adjusted P Value
		Baseline vs. 4-AP	0.0024	**
		Baseline vs. Wash Out	0.9943	ns
		4-AP vs. Wash Out	0.0028	**
